# Supplementary material
Source: Springer Nature journal article supplement (https://www.springermedizin.de/resource/supplementary/12916_2012_703_MOESM4_ESM.pdf/9598616)

Marsal

Skjaerven

0

0

1216

852

4

2435

1442

Gardosi

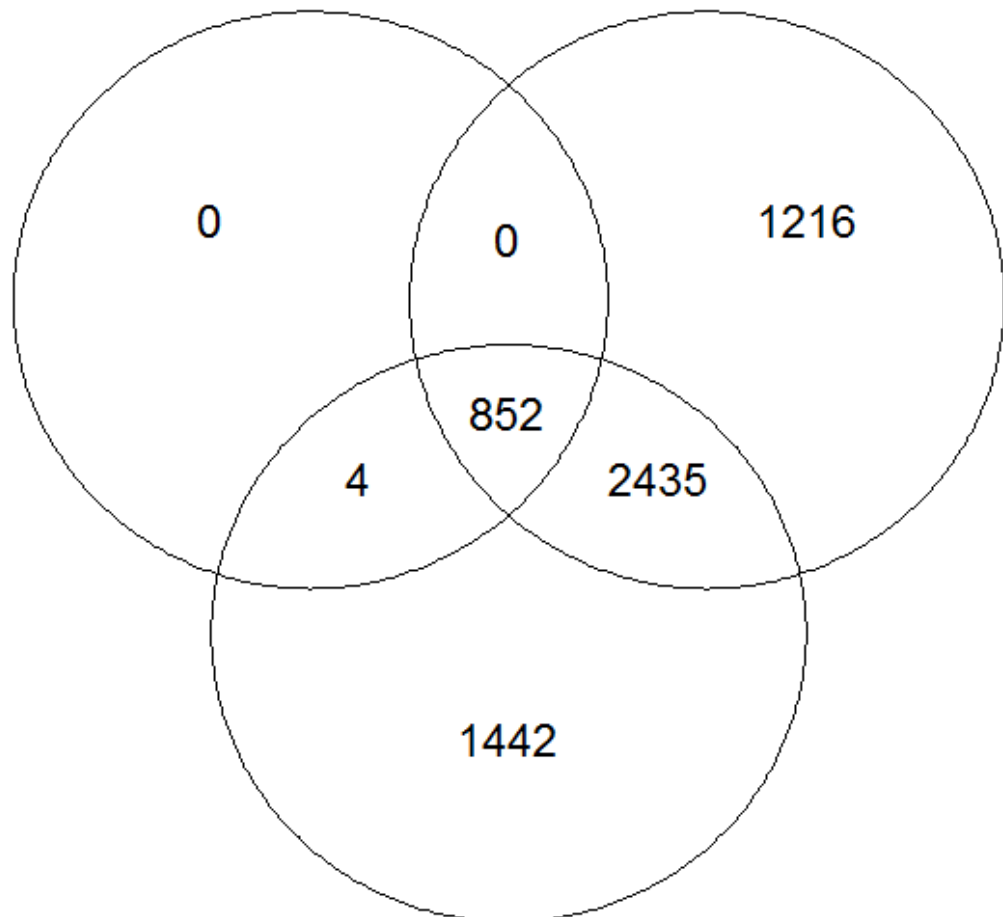

Supplement: MOESM4 [file 9598616]
